# Supplementary material
Source: PubMed Central journal article supplement (PMC2992367)
Supplement: supp_fj.10-165381_10-165381SuppData.pdf [file supp_fj.10-165381_10-165381SuppData.pdf]

## Supplemental Figures

### Figure legends

**Figure S1.** Specificity and selectivity of the antibodies used in this study. *A)* Both anti-Flag and anti- $\beta_3$  antibodies recognize identical "ladder"-like Flag- $\beta_3$  bands. Flag- $\beta_3$  was expressed in Cos7 and the cell lysate was subject to SDS-PAGE and immunoblotting (IB) under conditions described in Fig. 1A. *B)* The antibodies to tags and  $\beta_3$  antibody in immunoblotting or immunoprecipitation (IP) show no cross-reactivity. Flag-, V5-His- and Venus-tagged  $\beta_3$  subunits were each expressed in Cos7 cells, and aliquots of the cell lysate were subject to Flag immunoprecipitation and His-pull down, and then immunoblotted with the indicated antibodies. Flag immunoprecipitation and His-pull down recognized only the corresponding tagged proteins, and anti-tags antibodies recognized only the fusion proteins with their specific tags, while an anti- $\beta_3$  antibody recognized all the fusion proteins. Notice that non-specific (n.s.) band recognized by a His antibody (marked with \*) in the lysate fraction disappeared after His-pull down or Flag immunoprecipitation. *C)* Specificity of Flag-IP to study protein oligomerization. Oligomerization of bacterial alkaline phosphatase (BAP) sensitive to DDT treatment was used as an example. Flag-BAP (0.5  $\mu$ g, Sigma) was expressed in Cos7 cells and immunoprecipitated and immunoblotted with an anti-Flag antibody after standard heat denaturation (5 min, 95°C) with or without a prior DTT treatment. Non-transfected (NT) cells were used as negative control. Only a monomeric Flag-BAP was detected on Western blot after DTT treatment (arrow marked with \*), while dimers and trimers (arrows) were also observed in the absence of DTT treatment consistent with previous reports (1, 2). No reactivity was seen with the non-transfected cells (right panel). *D)* The immunoblot shown in Fig. 1F is  $\beta_3$ -specific. Samples collected by the same procedures as described in Fig. 1F were subject to immunoblotting with an anti- $\beta_3$  antibody, and all  $\beta_3$  bands were confirmed by this antibody.

**Figure S2.** Flag- $\beta_3$  oligomerizes at the expression level of mouse brain tissue. *A)* 200 mg of C57BL/6J mouse brain tissue was treated by a Cellytic MT (Sigma) lysis solution and 15 mg protein was loaded on the gel (left lane). Cos7 cells were transfected with the indicated amounts of Flag- $\beta_3$  plasmid and 15 mg of total protein with increasing expression of Flag- $\beta_3$  loaded on other lanes. Aliquots of the protein samples were treated with DTT as described in Methods,

subjected to immunoblotting with an anti- $\beta_3$  antibody, and the  $\beta_3$  bands intensities were normalized to their respective GAPDH levels (shown on the bottom). Amount of Flag- $\beta_3$  in the samples was relatively close to that of mouse brain tissue endogenous level. *B*) A "ladder"-like pattern of Flag- $\beta_3$  was observed when immunoblotting of the same samples was performed without the pre-treatment by DTT. The "ladders" were recognized by both a polyclonal anti- $\beta_3$  antibody and a monoclonal anti-Flag antibody. The monomer of Flag- $\beta_3$  is marked by (\*).

**Figure S3.** Plasma membrane localization of  $\alpha_{1C}$  and its mutants. Flag- $\alpha_{1C}$ ,  $\alpha_{1C}$ AID and  $\alpha_{1C}$ AID/IQ (1.2  $\mu$ g DNA each) were co-expressed with  $\alpha_2\delta$  (1.0  $\mu$ g) and Venus- $\beta_{2d}$  (0.8  $\mu$ g) in Cos7 cells. The membrane-bound complexes were labeled by cell surface biotinylation and isolated by avidin pull-down under conditions described in Fig. 4A, and 5% of each lysate was used as expression input. Non-transfected cells (NT) were used as negative control. Cytosolic proteins did not contaminate the membrane proteins fraction as confirmed by the absence of GADPH.

**Figure S4.** Mutagenesis study of  $\beta_3$  segmental oligomerization. Amino acid residues for mutagenesis were identified by deletion analysis of GK fragments NN (*A*), CN (*B*) and CC (*C*) inhibiting their binding to GKN and/or GKC (see Fig. 3). Panel 1, Schematic maps and amino acid residues of the tested GK fragments. The inactive fragments NC (*A*, *B*) and V2 (*C*) were used as carriers. The identified critical amino acid residues are shown in green and introduced amino acid mutations are shown in red. The GK deletion fragments and constructed mutants (*M*) were labeled with mVenus, co-expressed with Flag-GKN or Flag-GKC, and analyzed by anti-Flag-IP/Western blot (IB) with indicated antibodies to identify amino acid residues critical for the interaction between GKN and NN (*A*, 2), GKC and NN (*A*, 3), GKC and CN (*B*, 2), GKN and CC (*C*, 2) and GKC and CC (*C*, 3). Alanine mutation of the identified amino acid residues disrupted binding of the fragments to GKN and/or GKC as compared to the respective wild type fragments (panels *A*, 4; *B*, 3 and *C*, 4) but did not fully inhibit the oligomerization when incorporated in different combinations into  $\beta_3$  (see Supplemental Table S1).

**Figure S5.** Effects of  $\beta_3$  fragments on  $\beta_3$  oligomerization. Venus-tagged  $\beta_3$  fragments (see Fig. 3 for details) (0.4  $\mu$ g each) were co-expressed with Flag- $\beta_3$  (0.3  $\mu$ g) and Venus- $\beta_3$  (0.5  $\mu$ g). Flag

immunoprecipitation followed by GFP immunoblotting revealed that only GKC fragment binds to the  $\beta_3$  oligomeric complex and augments its oligomerization.

**Figure S6.** Interaction of  $\beta_3$  and its GK fragments with I-II linker. *A)* The presence of GK fragments does not affect the interaction of  $\beta_3$  with I-II linker. Venus- $\beta_3$  was co-expressed with V5-His-I-II linker in the absence (lane 1) or presence of the indicated GK fragments (lanes 2-9). The Venus- $\beta_3$  complexes with V5-His-I-II linker and GK fragments were revealed by immunoblotting with an anti-GFP antibody after His-pull down. *B)* Binding of GK fragments to I-II linker. V5-His-I-II linker was co-expressed with mVenus (lane 1) or the indicated Venus-labeled GK fragments (lanes 2-7). His-pull down followed by immunoblotting with an anti-GFP antibody revealed binding of GK, GKN, GKC, NN and CN to the I-II linker.

## References

1. Akiyama, Y., and Ito, K. (1993) Folding and assembly of bacterial alkaline phosphatase in vitro and in vivo. *J. Biol. Chem.* **268**, 8146-8150
2. Yeh, M. F., and Trela, J. M. (1976) Purification and characterization of a repressible alkaline phosphatase from *Thermus aquaticus*. *J. Biol. Chem.* **251**, 3134-3139

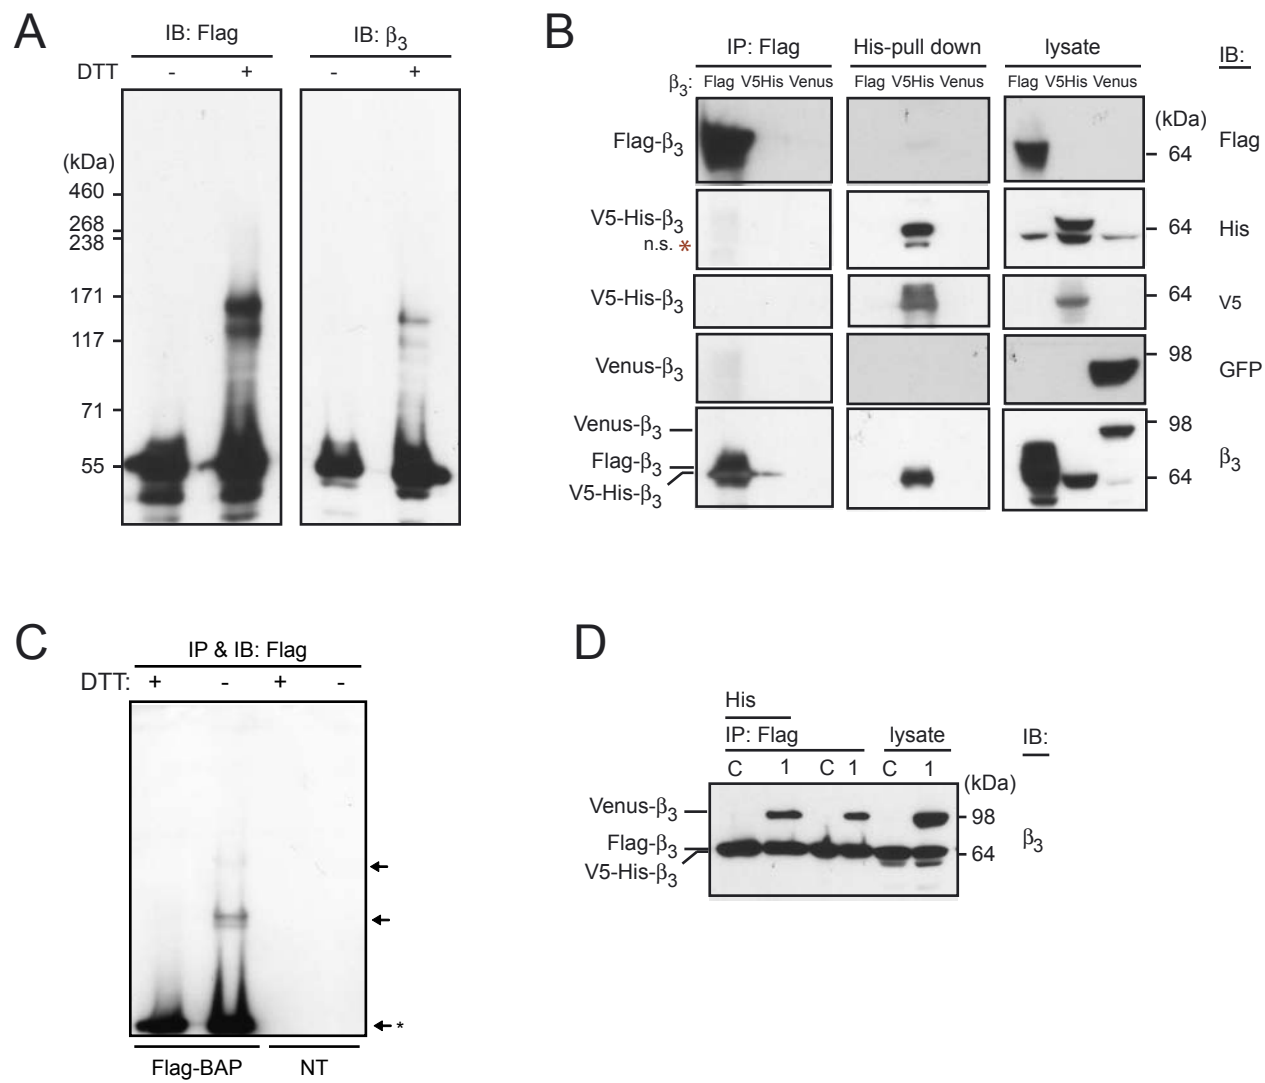

Supplemental Figure S1

**A**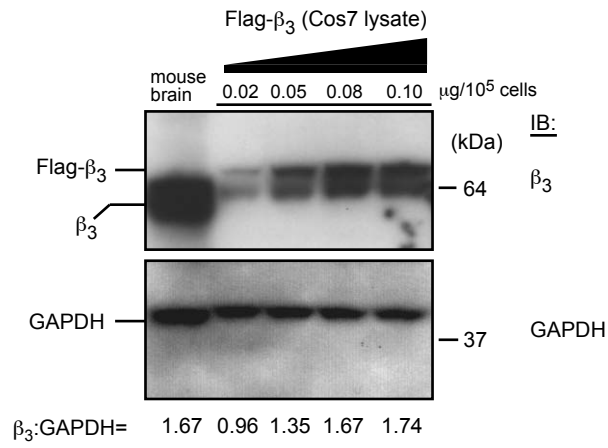**B**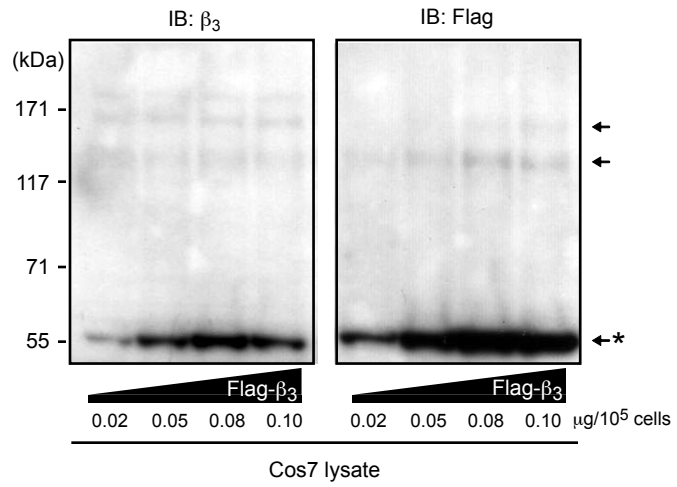

Supplemental Figure S2

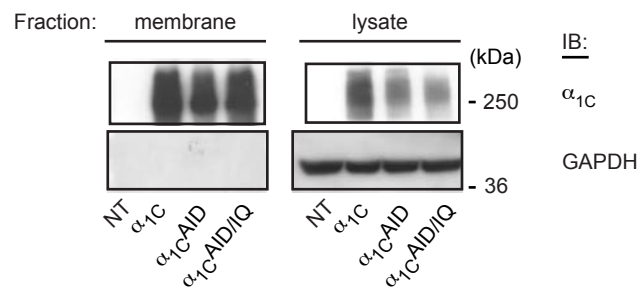

Supplemental Figure S3

**A**

(1)

|   |           |        |        |        |         |        |        |      |    |    |    |
|---|-----------|--------|--------|--------|---------|--------|--------|------|----|----|----|
|   | NN        |        |        |        |         |        | NC     |      |    |    |    |
| 1 | MRPVVLVGP | SLKGYE | VTMMQK | ALFDFL | KHRFDGR | ISITRV | TADL   | SL   | NC |    |    |
| 2 |           |        |        | MMQKAL | FDFLKH  | RFDGR  | ISITRV | TADL | SL | NC |    |
| 3 |           |        |        |        |         |        | SITRV  | TADL | SL | NC |    |
| 4 |           |        |        |        |         |        | TRV    | TADL | SL | NC |    |
| 5 |           |        |        |        |         |        | V      | TADL | SL | NC |    |
| 6 |           |        |        |        |         |        | A      | D    | L  | SL | NC |
| M |           |        |        |        |         |        | AAARV  | TADL | SL | NC |    |

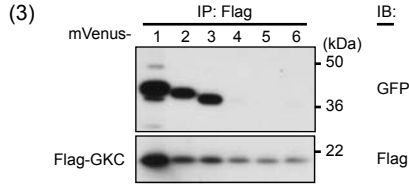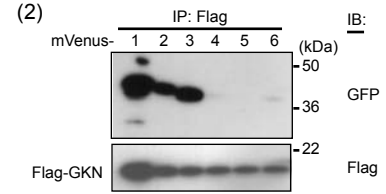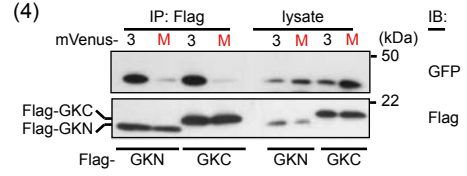

**B**

(1)

|   |    |          |                        |
|---|----|----------|------------------------|
|   | NC | CN       |                        |
| 1 | NC | LDADTINH | PAQL                   |
| 2 | NC | LDADTINH | PAQLAK                 |
| 3 | NC | LDADTINH | PAQLAKTS               |
| 4 | NC | LDADTINH | PAQLAKTSLA             |
| 5 | NC | LDADTINH | PAQLAKTSLAPI           |
| 6 | NC | LDADTINH | PAQLAKTSLAPIIV         |
| 7 | NC | LDADTINH | PAQLAKTSLAPIIVFVKVSSPL |
| M | NC | LDADTINH | PAQLAKTSAAPIAA         |

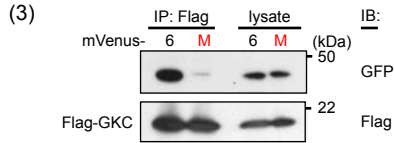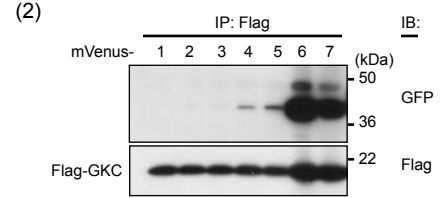

**C**

(1)

|   |      |       |       |       |       |        |        |       |       |       |     |
|---|------|-------|-------|-------|-------|--------|--------|-------|-------|-------|-----|
|   | CC   |       |       |       |       |        | V2     |       |       |       |     |
| 1 | MKHL | TVQMM | ATDKL | VQCP  | PPESF | DVIL   | DNQLED | ACEHL | AETL  | EVYWR | ATH |
| 2 | HL   | TVQMM | ATDKL | VQCP  | PPESF | DVIL   | DNQLED | ACEHL | AETL  | EVYWR | ATH |
| 3 |      | TVQMM | ATDKL | VQCP  | PPESF | DVIL   | DNQLED | ACEHL | AETL  | EVYWR | ATH |
| 4 |      | QMM   | ATDKL | VQCP  | PPESF | DVIL   | DNQLED | ACEHL | AETL  | EVYWR | ATH |
| 5 |      | MAT   | DKLV  | QCP   | PPESF | DVIL   | DNQLED | ACEHL | AETL  | EVYWR | ATH |
| 6 |      | TDKL  | VQCP  | PPESF | DVIL  | DNQLED | ACEHL  | AETL  | EVYWR | ATH   |     |
| 7 |      |       | KLV   | QCP   | PPESF | DVIL   | DNQLED | ACEHL | AETL  | EVYWR | ATH |
| M | MAAA | TVQMM | ATDKL | VQCP  | PPESF | DVIL   | DNQLED | ACEHL | AETL  | EVYWR | ATH |

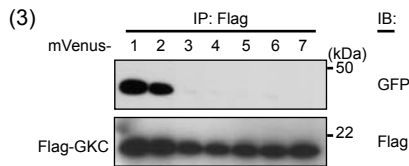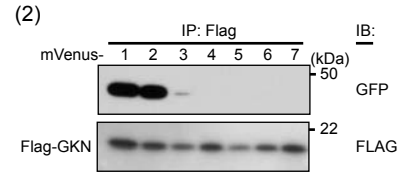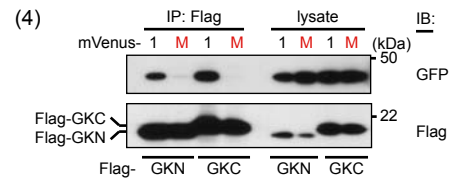

Supplemental Figure S4

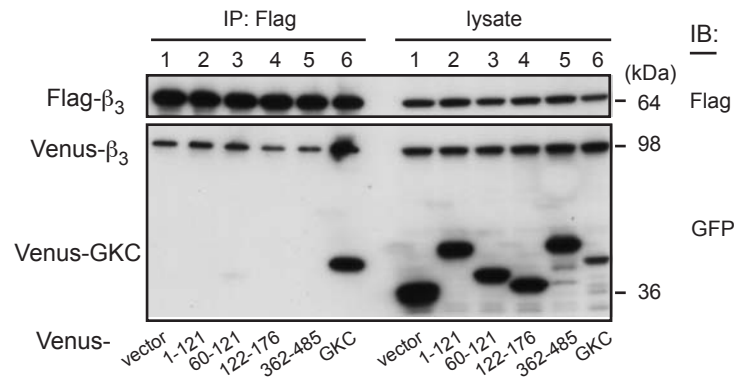

Supplemental Figure S5



A

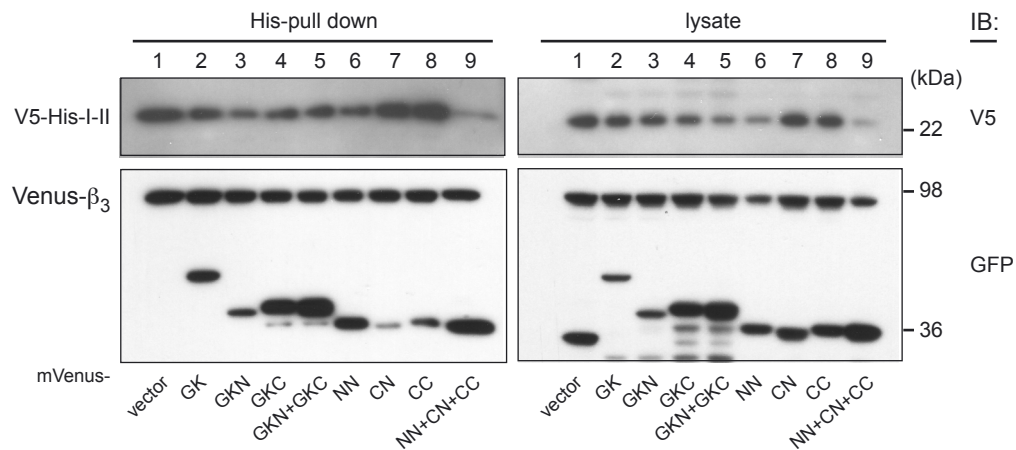

B

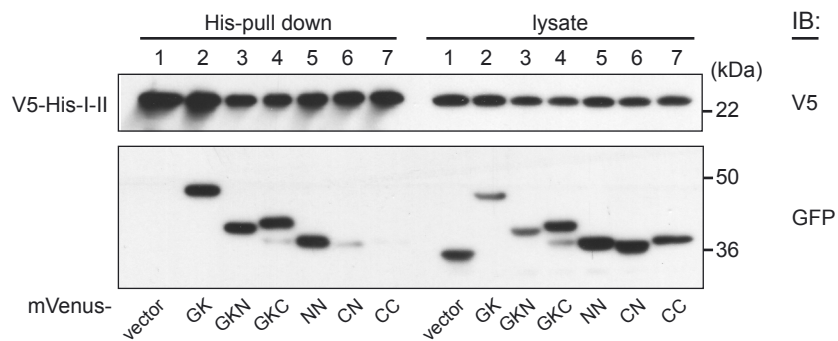

Supplemental Figure S6

**Table S1. List of tested  $\beta_3$  mutants**

|    | NN                      | NC          | CN                | CC                              |
|----|-------------------------|-------------|-------------------|---------------------------------|
| 1  | S213A/I214A/T215A       |             |                   |                                 |
| 2  |                         |             | L285A/I289A/V290A |                                 |
| 3  |                         |             |                   | K313A/H314A/L315A               |
| 4  | S213A/I214A/T215A       |             | L285A/I289A/V290A | K313A/H314A/L315A               |
| 5  | S213A/I214A/T215A       |             |                   | K313A/H314A/L315A               |
| 6  | I212K/S213K/I214K/T215K |             |                   | K313E/H314E/L314E               |
| 7  | L187A/G189A/Y190A       |             |                   | K313A/H314A/L315A               |
| 8  |                         | N231K/V267E |                   |                                 |
| 9  | D220Y                   |             |                   |                                 |
| 10 | L200Y                   |             | I274F             | L315Q                           |
| 11 |                         | E255V       | Q301L             | K355N                           |
| 12 | S213A/I214A/T215A       |             | L285A/I289A/V290A | K313A/H314A/L315A<br>C328A/C34A |

Shown are mutated sites in GK domain. Clones 1-5 carry the alanine mutations of the sensitive sites identified in Supplemental Fig. S3. Clone 6 carries the mutations that confer different charge on the regions. Clone 7 carries the alanine mutations on the sites showing some homology with the I-II linker AID domain in NN region together with the alanine mutations in the CC region. Clones 8-11 are the mutants created by random mutagenesis targeting on GK domain in full size Flag- $\beta_3$ . Ninety clones of random mutagenesis were labeled by Flag and screened by expression in Cos7 cells with the subsequent anti-Flag immunoblotting. Among the tested random mutants, clones 8-11 exhibited decreased tendency to show the “ladder”-like pattern on the blot in the absence of DTT treatment. These clones were selected for the anti-Flag co-immunoprecipitation screening. Clone 12 has two cysteine-to-alanine mutations in addition to the mutations listed in clone 4 to eliminate the possible disulfide bonds. All listed  $\beta_3$  mutants were labeled with Flag and mVenus, respectively, and differentially labeled pairs of the mutants were co-expressed for anti-Flag IP-Western blot analysis. None of the mutants exhibited decrease in oligomerization compared to that of Flag- and mVenus-labeled wild-type  $\beta_3$  pair.
